1 **Paraoxonase and acylated homoserine lactones in urine from patients with urinary tract**  
2 **infections**

3

4

5

6

7 John Lafleur<sup>1\*</sup>, Richard L. Amdur<sup>2</sup>

8

9

10 <sup>1</sup>Department Emergency Medicine, George Washington School of Medicine, Washington, DC,  
11 United States of America

12 <sup>2</sup>Department of Surgery, George Washington School of Medicine, Washington, DC, United  
13 States of America

14

15 \*Corresponding author

16 [johnelafleur@gmail.com](mailto:johnelafleur@gmail.com)

17

18

## 19 **Abstract**

20 Paraoxonases are mammalian enzymes that have a number of roles including the inhibition of  
21 bacterial virulence and biofilm formation by microorganisms that quorum sense with acylated  
22 homoserine lactones. Paraoxonases have previously been reported to inhibit *P. aeruginosa*  
23 biofilm formation in mammalian airways and skin. An innate immune role for paraoxonases in  
24 urinary tract infection has not previously been reported. We performed western blots for  
25 paraoxonase1 in urine from patients with urinary tract infection; we also tested urinary tract  
26 infection urine for the presence of acylated homoserine lactones using a cellular reporter system.  
27 We report here that paraoxonase1 was not found with our western blot assay in the urine of  
28 normal control patients; in those with urinary tract infection, paraoxonase1 was associated with  
29 *E. coli* UTI. Acylated homoserine lactones, but not paraoxonases, were found in the bulk urine of  
30 those with *P. aeruginosa* urinary tract infection. We hypothesize that paraoxonase may play a  
31 similar innate immune role in infected urine as has previously described in skin and airways.

32

33

34

35

36

37

38

## 39 Introduction

40 The paraoxonase PON family of mammalian lactonases are an evolutionarily conserved (1–3)  
41 innate immune mechanism that limit bacterial virulence and biofilm formation by degrading  
42 quorum sensing (QS) acylated homoserine lactones (AHLs) produced by some  
43 microorganisms.(4–13) These bacteria include *P. aeruginosa* as well as other environmental  
44 opportunists with large genomes and flexible lifestyles that are frequently found to be occult  
45 members of infecting biofilms.(14–16) Many of these belong to the group of non-fermenting  
46 gram negative bacilli (NFGNB).(17,18) UTI caused by NFGNB have been reported to more  
47 commonly infect those with urinary catheters, diabetes mellitus, and previous  
48 hospitalizations.(19) In multiple studies over the course of the last decade, PON have been  
49 shown to be protective against infection by *P. aeruginosa* biofilm formation in mammalian  
50 airways and skin cells.(9,20) Another body surface that is subject to environmental exposure is  
51 the urinary system, and PON has previously been reported in urine from healthy subjects.(21)

52 AHLs are known to be potent promoters of biofilm formation and virulence expression in gram  
53 negative pathogens that quorum sense with them, while at the same time causing tissue  
54 inflammation and derangement of host immunity.(22–26) Although they have not previously  
55 been reported, the presence of AHLs in urine from patients with UTI would support a role for  
56 PON in the defense against infection by *P. aeruginosa*.

57 Uncomplicated UTI in an immunocompetent host is characterized by single species infection,  
58 (27) *E. coli* 80% of the time. It may be hypothesized that the limited spectrum of uncomplicated  
59 UTI uropathogens is due to competent immunity, including the inhibition by PON of  
60 environmental opportunists that QS with AHLs, such as *P. aeruginosa* and many of the NFGNB.

61 To further explore these issues, we set out to assay for AHLs and PON in urine from patients  
62 with UTI presenting to the busy emergency department of a large city hospital. We hypothesized  
63 that 1) UTI patients will have PONS present, while non-UTI patients will not; 2) among UTI  
64 patients, the presence of PONS will be significantly associated with the presence of urinary  
65 pathogens

## 66 **Materials and methods**

### 67 **Human subjects enrollment**

68 Study protocol was reviewed/approved by Lifspan IRB

69 Study site: Anderson emergency department of Rhode Island Hospital

70 Inclusion criteria:

- 71 1. Greater than 18 years of age and able to give informed consent for study participation.
- 72 2. 10 or more white cells in urine analysis with symptoms of urinary tract infection.
- 73 3. Urine culture sent to the hospital microbiology department (prior to administration of  
74 antibiotics).

75 Control subjects: Emergency department patients with minor complaints unrelated to urinary  
76 system and without significant metabolic derangement such as fever, hyperglycemia, renal  
77 disease (acute or chronic), significant hypertension.

78 Urine samples: once enrolled in study subjects were asked to provide 50-100 ml of clean-catch  
79 urine in a sterile cup. This was immediately frozen at -80 for further study.

80 Growth media: Plates and broth were Luria-Bertani (LB).

81 Bacterial culture. The long chain HSL reporter strain *E. coli* JM109 (pSB1142) (carries *P.*  
82 *aeruginosa lasR* fused to luxCDABE), and *P. aeruginosa* PAO1 carrying PlasB-luxCDABE  
83 were grown in LB broth with shaking at 38 deg. C.

84 Reagents. 3-oxo-C12-HSL stock solution 20 mg/ml (Sigma-Aldrich) was diluted 1:50,000 in  
85 water. This dilution was arrived at empirically by testing against luminescence in the long chain  
86 HSL reporter strain *E. coli* JM109.

87 Western blotting. Urine samples from enrolled research subjects with UTI were stored at -80  
88 deg. C., and thawed for use. 25 microliter samples of unprocessed urine were assayed for PON1  
89 using the Bio-Rad iBlot system as previously described.

90 Antibodies. Primary antibody: polyclonal human PON1 from rabbit (Atlas Antibodies).

91 Secondary antibody: goat anti-rabbit reporter

## 92 **Measures**

93 Culture results were recoded into a binary variable (positive/negative). As a sensitivity analysis,  
94 we also coded those patients who were positive but with <50k cfu as negative. Positively skewed  
95 continuous variables and those with outliers were recoded into ordinal variables.

## 96 **Data analysis**

97 Associations between diagnosis and categorical variables were analyzed using chi-square or  
98 Fishers Exact Test. Comparison of continuous variables across groups was done using 2-tailed  
99 independent groups t-tests or the Kruskal-Wallis test for skewed variables. In order to test the  
100 independent association of PON1 with being culture-positive in UTI patients, we used  
101 multivariable logistic regression, adjusting for variables that might be confounds. These were  
102 defined as having an association with PON1 with  $p < .10$ . We also used a multivariable logistic

103 regression model to develop an optimal prediction model for being culture-positive in UTI  
104 patients. This was based on the patient variables that were associated with being culture-positive  
105 with  $p < .10$ , dropping any for which an odds ratio could not be calculated due to low sample size.  
106 SAS version 9.4 (Cary, NC) was used for data analysis, with  $p < .05$  considered significant.

107

## 108 **Results and discussion**

109 For the 70 patients in the study, mean age was  $60 \pm 22$ , 13 (19%) were black and 44 (63%) were  
110 white, and 48 (69%) were female. 11 (16%) were catheterized. Culture was positive in 39/61  
111 cases (64%), while PON1 was positive in 22 cases (36%). There were 61 UTI patients and 9  
112 controls in the sample.

113 Controls and UTI patients differed significantly on age, with UTI older, on serum creatinine  
114 (UTI higher), on highest temperature (UTI higher), and on lowest DBP (UTI lower), and there  
115 was a trend-level association for hemoglobin (UTI lower) (Table 1). Patients with UTI were  
116 older, and, probably for that reason, have higher average creatinine--due to age-related decline in  
117 kidney function (Table 1). Higher temperature in UTI subjects is likely due to some subjects  
118 being systemically ill.

119 **Table 1.** Patient variables by diagnosis (UTI vs control)

| Patient variable | Control (n=9) | UTI (n=61)  | p    |
|------------------|---------------|-------------|------|
| Age              | 42 $\pm$ 16   | 63 $\pm$ 22 | .009 |
| Race             |               |             | .45  |
| Black            | 3 (33%)       | 10 (16%)    |      |
| White            | 5 (56%)       | 39 (64%)    |      |
| Other            | 1 (11%)       | 12 (20%)    |      |
| Gender female    | 4 (44%)       | 44 (72%)    | .13  |

|                     |            |            |                   |
|---------------------|------------|------------|-------------------|
| Catheterized        | 0          | 11 (18%)   | .34               |
| WBC                 | 9.3 ± 4.4  | 11.4 ± 4.4 | .25               |
| Hemoglobin          | 13.7 ± 0.9 | 12.5 ± 1.9 | .07 <sup>A</sup>  |
| Serum creatinine    | 0.8 ± 0.1  | 1.2 ± 0.9  | .042 <sup>A</sup> |
| Highest HR          | 85 ± 14    | 93 ± 21    | .29               |
| Highest temp        | 97.7 ± 0.6 | 99.0 ± 1.5 | .0001             |
| Lowest systolic bp  | 123 ± 16   | 118 ± 20   | .40               |
| Lowest diastolic bp | 78 ± 11    | 68 ± 13    | .044              |

120 <sup>A</sup> using Kruskal-Wallis test.

121

122 PON1 was significantly associated with UTI diagnosis. Of the 61 UTI patients, 22 (36%) were

123 PON1 positive, while none of the controls were PON1 positive (Fisher Exact test p=.049).

124 PON1 was not significantly associated with any demographic or laboratory values (Table 2), but

125 was significantly associated with higher HR (higher in PON1 positive) (Table 2).

126 **Table 2.** Associations between patient variables and PON1 in patients with UTI

| Patient variable    | PON1 Neg (n=39) | PON1 Pos (n=22) | p                |
|---------------------|-----------------|-----------------|------------------|
| Age                 | 62 ± 22         | 63 ± 21         | .82              |
| Race                |                 |                 | .60              |
| Black               | 5 (13%)         | 5 (23%)         |                  |
| White               | 26 (67%)        | 13 (59%)        |                  |
| Other               | 8 (21%)         | 4 (18%)         |                  |
| Gender female       | 29 (74%)        | 15 (68%)        | .61              |
| Catheterized        | 5 (13%)         | 6 (27%)         | .18              |
| WBC                 | 11.2 ± 4.4      | 11.7 ± 4.6      | .68              |
| Hemoglobin          | 12.5 ± 2.0      | 12.4 ± 1.7      | .75              |
| Serum creatinine    | 1.2 ± 1.0       | 1.2 ± 0.5       | .48 <sup>A</sup> |
| Highest HR          | 88 ± 16         | 101 ± 25        | .03              |
| Highest temp        | 99.0 ± 1.6      | 98.9 ± 1.3      | .66              |
| Lowest systolic bp  | 120 ± 20        | 114 ± 20        | .27              |
| Lowest diastolic bp | 68 ± 12         | 70 ± 13         | .45              |

127 PON1 was significantly associated with positive culture in UTI patients: PON was positive in  
 128 4/22 with negative culture (18%) versus 18/39 with positive culture (46%; p=.03; Table 3). We  
 129 did a sensitivity analysis coding patients who had culture < 50k cfu as negative (rather than the  
 130 default coding as positive), and found that the association was still significant (culture negative  
 131 had 23% PON positive, culture positive had 48% PON positive, p=.04). Thus, in UTI patients,  
 132 presence of PON in urine was associated with urine culture growing out a urinary pathogen, in  
 133 contrast to urogenital flora, or no growth. However, in the sample of UTI patients, after  
 134 adjusting for higher HR, the association between PON1 and culture was no longer significant (an  
 135 OR for PON1 Pos vs Neg was 3.08 [95% ci 0.84-11.20], p=.09).

136 **Table 3.** Association of Positive Culture with PON1 and other patient variables, in patients with UTI.  
 137 N and column-% are shown.

| <b>Culture</b>      | <b>Culture Neg<br/>(n=22)</b> | <b>Culture Pos<br/>(n=39)</b> | <b>p</b> |
|---------------------|-------------------------------|-------------------------------|----------|
| PON1 Positive       | 4 (18%)                       | 18 (46%)                      | .03      |
| Age                 | 60 ± 24                       | 64 ± 20                       | .45      |
| Race                |                               |                               | .17      |
| Black               | 1 (5%)                        | 9 (23%)                       |          |
| White               | 16 (73%)                      | 23 (59%)                      |          |
| Other               | 5 (23%)                       | 7 (18%)                       |          |
| Gender female       | 16 (73%)                      | 28 (72%)                      | .94      |
| Catheterized        | 1 (5%)                        | 10 (26%)                      | .045     |
| WBC                 | 9.8 ± 3.5                     | 12.2 ± 4.6                    | .046     |
| Hemoglobin          | 12.7 ± 1.7                    | 12.3 ± 2.0                    | .44      |
| Serum creatinine    | 1.1 ± 0.6                     | 1.2 ± 1.0                     | .44      |
| Highest HR          | 86 ± 16                       | 97 ± 22                       | .064     |
| Highest temp        | 98.8 ± 1.4                    | 99.0 ± 1.5                    | .61      |
| Lowest systolic bp  | 119 ± 19                      | 116 ± 21                      | .58      |
| Lowest diastolic bp | 71 ± 9                        | 67 ± 14                       | .23      |



138 In addition to PON1, other patient variables that were associated with being culture-positive, in  
139 UTI patients, included WBC (higher with culture positive), and being catheterized (more  
140 frequent for culture positive). Highest HR was marginally associated with culture-positive (Table  
141 3). We created an optimal prediction model for being culture-positive, which included PON1,  
142 highest HR, and WBC (being catheterized was dropped because OR could not be calculated for  
143 this variable due to small sample size), which had an area under the ROC curve of 0.72 for  
144 predicting culture-positive.

145 Using the equation:  $\text{risk} = -2.43 + 1.007 * \text{PON1} + .014 * \text{highestHR} + .138 * \text{WBC}$ , and then  
146  $\text{probability} = \exp(\text{risk}) / (1 + \exp(\text{risk}))$ , and then splitting the probabilities into tertiles, we found  
147 that the observed incidence of being culture positive in tertiles 1 through 3, respectively, were  
148 39%, 75%, and 83% ( $p=.01$ ).

149 19 out of 38 positive urine cultures grew out *E. coli* alone (50%) . PON1 was positive in 10 of  
150 these (53%). When compared to cultures that grew out multiple organisms (including those with  
151 ‘urogenital flora’) PON was significantly associated with cultures that grew out *E. coli* alone,  
152  $P=0.05$  (Table 4). Four NFGNB (10%) were cultured from PON negative urines (all of them *P.*  
153 *aeruginosa*). In addition, three other gram-negative environmental opportunists were cultured  
154 from PON negative urines: *Serratia marscesens*, *Citrobacter freundii*, and *Klebsiella*  
155 *pneumoniae*. These organisms are lactose fermenters, so do not meet criteria for being NFGNB,  
156 however, like NFGNB, they are multi-drug resistant environmental opportunists. Additionally  
157 these bacteria have all been reported to produce or QS with AHLs.(28–30) Among PON positive  
158 urines there were no NFGNB in culture.

159 **Table 4.** Univariable association of presence of PON in urine with *E. coli* alone versus cultures growing  
160 out multiple different bacteria (including ‘urogenital flora’)

|          | <b>E. coli alone</b><br>(n=21) | <b>Mult. organisms.</b><br>(n=25) |
|----------|--------------------------------|-----------------------------------|
| PON pos. | 10 (53%)                       | 6 (24%)                           |
| PON neg. | 9 (47%)                        | 19 (76%)                          |

161 <sup>A</sup> Chi-square 5.3; P=0.05

162 Using an *E. coli* luminescent reporter construct, C12 AHL was also assayed for in urine samples.  
163 C12 AHLs were only seen in the urines that were culture positive for *P. aeruginosa*.  
164 Concentrations of C12 AHL in one sample (patient #9) was about 1.5 micromolar. The other  
165 three samples in which *P. aeruginosa* grew out of culture had considerably lower concentrations  
166 (see table 5). Biologically relevant concentrations of AHLs for QS are considered to be 1-5  
167 micromolar.(25) One possible interpretation of concentrations of C12 considerably below this in  
168 three of four samples suggests that QS and virulence expression in *P. aeruginosa* UTI is not a  
169 planktonic phenomenon in the urine but occurring on mucosal surfaces of the bladder/urinary  
170 system where surface colonization/biofilm formation can take place, and immune interactions are  
171 likely to take place.

172 **Table 5.** Subjects whose cultures grew out *P. aeruginosa* had urine that contained C12 AHL  
173 (except for subject #61 where it was not detectable).

| <b>Subject #</b> | <b>Luminescence (ALU)</b> | <b>Micromolar conc.</b> |
|------------------|---------------------------|-------------------------|
| 9                | 167,000                   | 1.5                     |
| 25               | 22,000                    | 0.2                     |
| 35               | 8,000                     | 0.07                    |
| 61               | 0                         | 0                       |

174

175 These preliminary results indicate a positive association between PON level and positive culture  
176 in patients with UTI, although HR may be functioning as a confounding factor. Levels of C12  
177 AHL in planktonic cultures necessary to initiate QS-related *lasB* expression have previously  
178 been reported to be about 1 micromolar(31), a concentration of C12 AHLs that is not  
179 uncommonly seen in planktonic cultures of *P. aeruginosa*. By contrast, C12 AHL levels  
180 associated with *P. aeruginosa* biofilms in flow cells have been found to be hundreds of times  
181 higher.(32) C12 AHL levels in urine from subjects with *P. aeruginosa* UTI have not previously  
182 been reported, though detection in urine of non-AHL *P. aeruginosa* mediators of QS associated  
183 with pulmonary infection has recently been reported.(33) In the current study results are  
184 somewhat equivocal as 3 out of 4 urines were found to contain concentrations of C12 AHLs  
185 significantly below the 1 micromolar threshold. There are two possible scenarios that may be  
186 imagined in the case of *P. aeruginosa* UTI—that QS occurs mostly on bladder mucosa surfaces  
187 where concentrations of microorganisms are likely to be higher, and interactions with mediators  
188 of host immunity more intense, or that QS is also occurring in bulk urine. Host bladder epithelial  
189 response to UTI include urination, exocytosis of intracellular urinary pathogens, and sloughing  
190 of bladder epithelial cells with adherent or intracellular urinary pathogens.(34) Since most  
191 planktonic *P. aeruginosa* in UTI will be flushed with urination, possible adaptive advantages  
192 conferred by QS among planktonic population of *P. aeruginosa* are that production of virulence  
193 factors, such as C12 AHL, may be ramped up in the *P. aeruginosa* population as a whole if QS is  
194 occurring in bulk urine. The results of the current study are preliminary, but since 3 of 4 samples  
195 showed what appear to be significantly sub-threshold levels of C12 AHL, QS at mucosal  
196 surfaces seems more likely. Urine has recently been reported to independently promote *P.*

197 *aeruginosa* biofilm formation,(35) suggesting that in the absence of the normal QS-mediated  
198 mechanisms for biofilm formation, a biofilm may still be formed in *P. aeruginosa* UTI.

199 We found in the current study that the presence of PON predicts growth of uropathogens as  
200 opposed to “urogenital flora” or, “no growth”. The latter two are results of urine culture which  
201 are not considered to represent significant infections, but, rather, some source of inflammation  
202 resulting in urinary symptoms mimicking acute UTI. One possible explanation for this is that  
203 UTI-mediated upregulation of urinary system TLR4/5 may result in the increases expression of  
204 PON seen in our PON positive UTI subjects. Urinary TLR signaling has been found to be  
205 sensitive to uropathogens,(36,37) resulting in activation of NF-kB and the expression of the pro-  
206 inflammatory genes IL-6 and IL-8 with consequent ingress to the bladder mucosa of  
207 neutrophils.(38) There is no report in the literature of TLR4/5 mobilization of PON, so at present  
208 this remains conjecture. By combining information on PON1 level, higher HR, and WBC, it was  
209 possible to obtain an accurate estimate of the probability of having positive cultures.

210 Our findings include that PON positive subjects had significantly more UTIs caused by *E. coli*  
211 alone, rather than multi-species infections, or infections with opportunists such as *P. aeruginosa*.  
212 It has previously been reported that the large majority of uncomplicated UTIs in normal hosts are  
213 caused by single species—meaning that under normal conditions community richness in UTI is  
214 very limited compared to other human microbiomes.(27) Infection associated with impaired  
215 immunity is characterized by difficult to eradicate biofilms, polymicrobial infections, and  
216 infection with opportunistic organisms that don’t readily infect immune-competent hosts.  
217 Viewed in this light, PON positive patients more nearly conform to immune-competent patients  
218 with UTIs caused by a single pathogen, while PON negative patients were more likely to have  
219 UTIs more characteristic of deranged immune competence. The current study does not make it

220 possible to draw any causal link between the presence of PON in urine and the immune-  
221 competent pattern of uncomplicated UTI caused by a single pathogen, mostly *E. coli*. However,  
222 the role of PON in innate immunity of the airway and skin,(9,20) and the role that AHL QS plays  
223 in many NFGNB environmental opportunists, along with possible occult roles played by  
224 fastidious environmental opportunists in establishing complex multi-species infections,(39)  
225 suggests that urinary PON may have a protective role.

## 226 **Conclusion**

227 The current study reports for the first time AHLs in the urine of subjects with *P. aeruginosa*  
228 UTIs. However, the significance of this, and the role that AHLs play in QS among planktonic *P.*  
229 *aeruginosa* remains to be investigated. We found that UTI subjects with PON positive urines  
230 were much more likely to have uncomplicated *E. coli* UTI. What mechanism, if any, underlies  
231 this finding is at present unclear.

232

233

234

235

236

237

238

## 239   **References**

- 240   1.    Bar-Rogovsky H, Hugenmatter A, Tawfik DS. The evolutionary origins of detoxifying  
241       enzymes: the mammalian serum paraoxonases (PONs) relate to bacterial homoserine  
242       lactonases. *J Biol Chem* [Internet]. 2013 Aug 16 [cited 2014 Dec 3];288(33):23914–27.  
243       Available from:  
244       [http://www.pubmedcentral.nih.gov/articlerender.fcgi?artid=3745338&tool=pmcentrez&re](http://www.pubmedcentral.nih.gov/articlerender.fcgi?artid=3745338&tool=pmcentrez&rendertype=abstract)  
245       ndertype=abstract
- 246   2.    Elias M, Tawfik DS. Divergence and convergence in enzyme evolution: parallel evolution  
247       of paraoxonases from quorum-quenching lactonases. *J Biol Chem* [Internet]. 2012 Jan 2  
248       [cited 2013 Feb 28];287(1):11–20. Available from:  
249       [http://www.pubmedcentral.nih.gov/articlerender.fcgi?artid=3249062&tool=pmcentrez&re](http://www.pubmedcentral.nih.gov/articlerender.fcgi?artid=3249062&tool=pmcentrez&rendertype=abstract)  
250       ndertype=abstract
- 251   3.    Khersonsky O, Tawfik DS. Structure-reactivity studies of serum paraoxonase PON1  
252       suggest that its native activity is lactonase. *Biochemistry*. 2005 Apr 26;44(16):6371–82.
- 253   4.    Chun CK, Ozer EA, Welsh MJ, Zabner J, Greenberg EP. Inactivation of a *Pseudomonas*  
254       aeruginosa quorum-sensing signal by human airway epithelia. *Proc Natl Acad Sci U S A*.  
255       2004 Mar 9;101(10):3587–90.
- 256   5.    Ozer E a, Pezzulo A, Shih DM, Chun C, Furlong C, Lusic AJ, et al. Human and murine  
257       paraoxonase 1 are host modulators of *Pseudomonas aeruginosa* quorum-sensing. *FEMS*  
258       *Microbiol Lett* [Internet]. 2005 Dec 1 [cited 2014 Oct 16];253(1):29–37. Available from:  
259       <http://www.ncbi.nlm.nih.gov/pubmed/16260097>
- 260   6.    Manolescu B. Paraoxonases as Protective Agents Against N-Acyl Homoserine Lactone–  
261       Producing Pathogenic Microorganisms. *Maedica (Buchar)* [Internet]. 2013 [cited 2014  
262       Oct 16];8(1):49–52. Available from:  
263       <http://www.ncbi.nlm.nih.gov/pmc/articles/PMC3749762/>
- 264   7.    Stoltz DA, Ozer EA, Taft PJ, Barry M, Liu L, Kiss PJ, et al. *Drosophila* are protected from  
265       *Pseudomonas aeruginosa* lethality by transgenic expression of paraoxonase-1. *J Clin*  
266       *Invest*. 2008 Sep;118(9):3123–31.
- 267   8.    Stoltz DA, Ozer EA, Ng CJ, Janet MY, Reddy ST, Lusic AJ, et al. Paraoxonase-2  
268       deficiency enhances *Pseudomonas aeruginosa* quorum sensing in murine tracheal  
269       epithelia. *Am J Physiol Cell Mol Physiol*. 2007;292(4):L852–60.
- 270   9.    Simanski M, Babucke S, Eberl L, Harder J. Paraoxonase 2 acts as a quorum sensing-  
271       quenching factor in human keratinocytes. *J Invest Dermatol* [Internet]. 2012 Sep [cited  
272       2013 Feb 13];132(9):2296–9. Available from:  
273       <http://www.ncbi.nlm.nih.gov/pubmed/22534874>
- 274   10.   Devarajan A, Bourquard N, Grijalva VR, Gao F, Ganapathy E, Verma J, et al. Role of  
275       PON2 in innate immune response in an acute infection model. *Mol Genet Metab*

- 276 [Internet]. 2013 Nov [cited 2014 Oct 18];110(3):362–70. Available from:  
277 <http://www.ncbi.nlm.nih.gov/pubmed/23911207>
- 278 11. Schweikert E-M, Amort J, Wilgenbus P, Förstermann U, Teiber JF, Horke S.  
279 Paraoxonases-2 and -3 Are Important Defense Enzymes against *Pseudomonas aeruginosa*  
280 Virulence Factors due to Their Anti-Oxidative and Anti-Inflammatory Properties. *J Lipids*  
281 [Internet]. 2012 Jan [cited 2013 Feb 13];2012:352857. Available from:  
282 [http://www.pubmedcentral.nih.gov/articlerender.fcgi?artid=3335252&tool=pmcentrez&re](http://www.pubmedcentral.nih.gov/articlerender.fcgi?artid=3335252&tool=pmcentrez&rendertype=abstract)  
283 [ndertype=abstract](http://www.pubmedcentral.nih.gov/articlerender.fcgi?artid=3335252&tool=pmcentrez&rendertype=abstract)
- 284 12. Amara N, Krom BP, Kaufmann GF, Meijler MM. Macromolecular inhibition of quorum  
285 sensing: enzymes, antibodies, and beyond. *Chem Rev*. 2011 Jan 12;111(1):195–208.
- 286 13. Gowda LK, Marie MAM. Role of quorum-sensing molecules in infections caused by  
287 Gram-negative bacteria and host cell response. *Rev Med Microbiol* [Internet]. 2014 Jul  
288 [cited 2014 Dec 3];25(3):66–70. Available from:  
289 [http://content.wkhealth.com/linkback/openurl?sid=WKPTLP:landingpage&an=00013542-](http://content.wkhealth.com/linkback/openurl?sid=WKPTLP:landingpage&an=00013542-201407000-00002)  
290 [201407000-00002](http://content.wkhealth.com/linkback/openurl?sid=WKPTLP:landingpage&an=00013542-201407000-00002)
- 291 14. Dubern J-F, Cigana C, De Simone M, Lazenby J, Juhas M, Schwager S, et al. Integrated  
292 whole genome screening for *Pseudomonas aeruginosa* virulence genes using multiple  
293 disease models reveals that pathogenicity is host specific. *Environ Microbiol* [Internet].  
294 2015;n/a-n/a. Available from: <http://doi.wiley.com/10.1111/1462-2920.12863>
- 295 15. Tümmler B, Wiehlmann L, Klockgether J, Cramer N. Advances in understanding  
296 *Pseudomonas*. *F1000Prime Rep* [Internet]. 2014;6(February):9. Available from:  
297 </pmc/articles/PMC3913036/?report=abstract>
- 298 16. Davenport P, Griffin JL, Welch M. Quorum sensing is accompanied by global metabolic  
299 changes in the opportunistic human pathogen, *Pseudomonas aeruginosa*. *J*  
300 *Bacteriol* [Internet]. 2015;197(12):JB.02557-14. Available from:  
301 <http://jb.asm.org/lookup/doi/10.1128/JB.02557-14>
- 302 17. Vincenti S, Quaranta G, De Meo C, Bruno S, Ficarra MG, Carovillano S, et al. Non-  
303 fermentative gram-negative bacteria in hospital tap water and water used for  
304 haemodialysis and bronchoscope flushing: Prevalence and distribution of antibiotic  
305 resistant strains. *Sci Total Environ* [Internet]. 2014;499:47–54. Available from:  
306 <http://linkinghub.elsevier.com/retrieve/pii/S004896971401208X>
- 307 18. Brooke JS. *Stenotrophomonas maltophilia*: An emerging global opportunistic pathogen.  
308 *Clin Microbiol Rev*. 2012;25:2–41.
- 309 19. Solanki R, Dawar R. Nonfermenting Gram-Negative Bacilli and Urinary Tract Infection -  
310 Sorting the Mystery of Infections Caused. *J Med Microbiol Diagnosis* [Internet].  
311 2015;04(04):2–5. Available from: [http://www.omicsonline.org/open-](http://www.omicsonline.org/open-access/nonfermenting-gramnegative-bacilli-and-urinary-tract-infection-sortingthe-mystery-of-infections-caused-2161-0703-1000210.php?aid=65584)  
312 [access/nonfermenting-gramnegative-bacilli-and-urinary-tract-infection-sortingthe-](http://www.omicsonline.org/open-access/nonfermenting-gramnegative-bacilli-and-urinary-tract-infection-sortingthe-mystery-of-infections-caused-2161-0703-1000210.php?aid=65584)  
313 [mystery-of-infections-caused-2161-0703-1000210.php?aid=65584](http://www.omicsonline.org/open-access/nonfermenting-gramnegative-bacilli-and-urinary-tract-infection-sortingthe-mystery-of-infections-caused-2161-0703-1000210.php?aid=65584)
- 314 20. Stoltz DA, Ozer EA, Zabner J. paraoxonases, quorum sensing, and pseudomonas

- 315 aeruginosa.pdf. The Paraoxonases: Their Role in Disease Development and Xenobiotic  
316 Metabolism. Springer; 2008. 307-319 p.
- 317 21. Lescuyer P, Pernin A, Hainard A, Bigeire C, Burgess JA, Zimmermann-Ivol C, et al.  
318 Proteomic analysis of a podocyte vesicle-enriched fraction from human normal and  
319 pathological urine samples. *ProteomicsClinical Appl*. 2008 Jul;2(7–8):1008–18.
- 320 22. Boontham P, Robins A, Chandran P, Pritchard D, Camara M, Williams P, et al.  
321 Significant immunomodulatory effects of *Pseudomonas aeruginosa* quorum-sensing signal  
322 molecules: possible link in human sepsis. *Clin Sci (Lond)*. 2008 Dec;115(11):343–51.
- 323 23. Hartmann A, Schikora A. Quorum sensing of bacteria and trans-kingdom interactions of  
324 N-acyl homoserine lactones with eukaryotes. *J Chem Ecol* [Internet]. 2012 Jun [cited 2013  
325 Feb 12];38(6):704–13. Available from: <http://www.ncbi.nlm.nih.gov/pubmed/22648507>
- 326 24. Li Y, Zhou H, Zhang Y, Chen C, Huang B, Qu P, et al. N-3-(oxododecanoyl)-L-  
327 homoserine lactone promotes the induction of regulatory T-cells by preventing human  
328 dendritic cell maturation. *Exp Biol Med* [Internet]. 2015;240:896–903. Available from:  
329 <http://ebm.sagepub.com/lookup/doi/10.1177/1535370214564742>
- 330 25. Kravchenko V V., Kaufmann GF, Mathison JC, Scott D a., Katz AZ, Wood MR, et al. N-  
331 (3-oxo-acyl)homoserine lactones signal cell activation through a mechanism distinct from  
332 the canonical pathogen-associated molecular pattern recognition receptor pathways. *J Biol*  
333 *Chem*. 2006;281(39):28822–30.
- 334 26. Kravchenko V, Garner AL, Mathison J, Seit-Nebi A, Yu J, Gileva IP, et al. Facilitating  
335 Cytokine-Mediated Cancer Cell Death by Proteobacterial N -Acylhomoserine Lactones.  
336 *ACS Chem Biol* [Internet]. 2013;8:1117–20. Available from:  
337 <http://dx.doi.org/10.1021/cb4000184>
- 338 27. Willner D, Low S, Steen J a., George N, Nimmo GR, Schembri M a., et al. Single clinical  
339 isolates from acute uncomplicated urinary tract infections are representative of dominant  
340 In Situ populations. *MBio*. 2014;5(2):1–10.
- 341 28. Annapoorani A, Karim A, Abdul K. Inhibition of Quorum Sensing Mediated Virulence  
342 Factors Production in Urinary Pathogen *Serratia marcescens* PS1 by Marine Sponges.  
343 2012;52(June):160–6.
- 344 29. Hentzer M, Givskov M. Pharmacological inhibition of quorum sensing for the treatment  
345 of chronic bacterial infections. *J Clin Invest*. 2003 Nov;112(9):1300–7.
- 346 30. Yin W, Purmal K, Chin S, Chan X, Koh C, Sam C, et al. N-Acyl Homoserine Lactone  
347 Production by *Klebsiella pneumoniae* Isolated from Human Tongue Surface.  
348 2012;4:3472–83.
- 349 31. Pearson JP, Passador L, Iglewski BH, Greenberg EP. A second N-acylhomoserine lactone  
350 signal produced by *Pseudomonas aeruginosa*. *Proc Natl Acad Sci U S A*.  
351 1995;92(February):1490–4.
- 352 32. Charlton TS, de Nys R, Netting a, Kumar N, Hentzer M, Givskov M, et al. A novel and



- 353 sensitive method for the quantification of N-3-oxoacyl homoserine lactones using gas  
354 chromatography-mass spectrometry: application to a model bacterial biofilm. *Environ*  
355 *Microbiol.* 2000;2:530–41.
- 356 33. Barr HL, Halliday N, Camara M, Barrett D a., Williams P, Forrester DL, et al.  
357 *Pseudomonas aeruginosa* quorum sensing molecules correlate with clinical status in cystic  
358 fibrosis. *Eur Respir J* [Internet]. 2015;1–9. Available from:  
359 <http://erj.ersjournals.com/cgi/doi/10.1183/09031936.00225214>
- 360 34. Greene SE, Hibbing ME, Janetka J, Chen SL, Hultgren J. Human Urine Decreases  
361 Function and Expression of Type 1 Pili in Uropathogenic *Escherichia coli*. *MBio.*  
362 2015;6(4):1–9.
- 363 35. Cole SJ, Records AR, Orr MW, Linden SB, Lee VT. Catheter-associated urinary tract  
364 infection by *Pseudomonas aeruginosa* is mediated by exopolysaccharide-independent  
365 biofilms. *Infect Immun.* 2014;82(5):2048–58.
- 366 36. Ragnarsdóttir B, Jönsson K, Urbano A, Grönberg-Hernandez J, Lutay N, Tammi M, et al.  
367 Toll-like receptor 4 promoter polymorphisms: common TLR4 variants may protect against  
368 severe urinary tract infection. *PLoS One* [Internet]. 2010 Jan [cited 2014 Oct  
369 18];5(5):e10734. Available from:  
370 [http://www.pubmedcentral.nih.gov/articlerender.fcgi?artid=2873976&tool=pmcentrez&re](http://www.pubmedcentral.nih.gov/articlerender.fcgi?artid=2873976&tool=pmcentrez&rendertype=abstract)  
371 [ndertype=abstract](http://www.pubmedcentral.nih.gov/articlerender.fcgi?artid=2873976&tool=pmcentrez&rendertype=abstract)
- 372 37. Ingersoll M a, Albert ML. From infection to immunotherapy: host immune responses to  
373 bacteria at the bladder mucosa. *Mucosal Immunol* [Internet]. 2013 Nov [cited 2014 Oct  
374 20];6(6):1041–53. Available from: <http://www.ncbi.nlm.nih.gov/pubmed/24064671>
- 375 38. Nielubowicz GR, Mobley HLT. Host-pathogen interactions in urinary tract infection. *Nat*  
376 *Rev Urol* [Internet]. 2010;7(8):430–41. Available from:  
377 <http://dx.doi.org/10.1038/nrurol.2010.101>
- 378 39. Zhang L, Gowardman J, Morrison M, Krause L, Playford EG, Rickard CM. Molecular  
379 investigation of bacterial communities on intravascular catheters: No longer just  
380 *Staphylococcus*. *Eur J Clin Microbiol Infect Dis.* 2014;33:1189–98.

381
